# Supplementary material for: Lipid protection by polyphenol-rich apple matrices is modulated by pH and pepsin in in vitro gastric digestion
Source: Royal Society of Chemistry journal article supplement (doi:10.1039/c9fo00705a), 2019-01-01

## Supplementary data.

### Composition data of Reinette apple

Reinette apple contained 3.15 g of glucose, 5.85 g of fructose, 1.09 g of saccharose, 0.04 g of citric acid and 1.61 g of malic acid per 100 g of fresh fruit. Dehydroascorbic acid (17.7 mg per 100 g FM) was markedly higher than ascorbic acid (5.9 mg per 100 g).

**Table 1.** Phenolic compounds identified by UPLC/DAD/ESI-MS<sup>n</sup> in apple (*Reinette de Flandre*).

| No. | t <sub>R</sub> (min) | λ <sub>max</sub> (nm) | [M-H] <sup>-</sup> (m/z) | MS <sup>2</sup> fragments (m/z)                                                                       | Proposed structure                                              |
|-----|----------------------|-----------------------|--------------------------|-------------------------------------------------------------------------------------------------------|-----------------------------------------------------------------|
| 1   | 6.6                  | 280                   | 577                      | 559, 451, <b>425</b> , 407, 299, 289, 273, 245                                                        | B-Type dimer                                                    |
| 2   | 7.0                  | 280                   | 289                      | 271, <b>245</b> , 231, 205, 179                                                                       | (+)-Catechin                                                    |
| 3   | 7.4                  | 326, 259sh            | 353                      | 191                                                                                                   | 5-Caffeoylquinic acid <sup>a</sup> (chlorogenic acid)           |
| 4   | 8.0                  | 316, 290sh            | 325                      | 265, 235, 205, 187, 163, <b>145</b> , 119                                                             | Coumaroylhexoside                                               |
| 5   | 8.25                 | 280                   | 451                      | <b>289</b> , 245, 161                                                                                 | Cinchonain I <sup>b</sup>                                       |
| 6   | 8.6                  |                       | 865                      | 847, 739, 713, <b>695</b> , 577, 575, 451, 407, 287                                                   | B-Type trimer                                                   |
| 7   |                      |                       | 353                      | 191, 179, <b>173</b>                                                                                  | 4-Caffeoylquinic acid <sup>a</sup> (cryptochlorogenic acid)     |
| 8   | 8.85                 | 280                   | 1153                     | <b>1027</b> , 1001, 983, 907, 865, 863, 577, 575, 500, <b>491</b> , 451, 449, 425, 413, 407, 288, 286 | B-Type tetramer                                                 |
| 9   |                      |                       | 865                      | 847, 739, 713, <b>695</b> , 577, 575, 451, 407, 287                                                   | B-Type trimer                                                   |
| 10  | 9.05                 | 284, 320sh            | 465                      | <b>303</b> , 285                                                                                      | Taxifolin hexoside                                              |
| 11  | 9.85                 | 280                   | 577                      | 559, 451, <b>425</b> , 407, 299, 289, 245                                                             | B-Type dimer                                                    |
| 12  |                      |                       | 865                      | 847, 739, 713, <b>695</b> , 577, 575, 453, 451, 407, 287                                              | B-Type trimer                                                   |
| 13  | 9.95                 | 285sh, 331            | 355                      | 295, 265, 235, 216, <b>193</b> , 175, 160, 135                                                        | Feruloylhexoside                                                |
| 14  | 10.3                 | 290sh, 313            | 337                      | <b>191</b> , 163                                                                                      | 5- <i>p</i> -coumaroylquinic acid ( <i>trans</i> ) <sup>a</sup> |
| 15  | 10.5                 | 280                   | 720 <sup>c</sup>         | 701, 643, <b>635</b> , 577, 575, 451, 407, 288, 286                                                   | B-Type pentamer                                                 |
| 16  | 10.9                 | 279                   | 289                      | 271, <b>245</b> , 231, 205, 179                                                                       | (-)-Epicatechin                                                 |
| 17  |                      |                       | 1153                     |                                                                                                       | B-Type tetramer                                                 |
| 18  | 11.1                 | 312, 285sh            | 337                      | <b>173</b> , 163                                                                                      | 4- <i>p</i> -coumaroylquinic acid ( <i>trans</i> ) <sup>a</sup> |

| No. | t <sub>R</sub> (min) | λ <sub>max</sub> (nm) | [M-H] <sup>-</sup> (m/z) | MS <sup>2</sup> fragments (m/z)                                       | Proposed structure                    |
|-----|----------------------|-----------------------|--------------------------|-----------------------------------------------------------------------|---------------------------------------|
| 19  | 11.4                 | 280                   | 1153                     | 1135, 1027, 1001, 984, 865, <b>863</b> , 739, 701, 577, 575, 425      | B-Type tetramer                       |
| 20  | 11.5                 |                       | 720 <sup>c</sup>         | 701, <b>635</b> , 577, 575, 451, 425, 289, 287                        | B-Type pentamer                       |
| 21  | 12.55                | 280                   | 864 <sup>c</sup>         | 779, 719, 695, 577, 575, 449, 407, 288, 286                           | B-Type hexamer                        |
| 22  | 13.25                | 280                   | 720 <sup>c</sup>         | 711, 644, <b>635</b> , 577, 575, 559, 451, 407, 289, 287              | B-Type pentamer                       |
| 23  | 13.45                | 280                   | 865                      | 847, 739, 713, <b>695</b> , 577, 575, 543, 425, 407, 287              | B-Type trimer                         |
| 24  | 14.35                | 280                   | 1153                     | 1135, 1027, 1001, 983, <b>865</b> , 863, 739, 701, 577, 575, 449, 407 | B-Type tetramer                       |
| 25  | 14.55                | 280                   | 1153                     | 1135, 1027, 1001, 983, <b>865</b> , 863, 739, 701, 577, 575, 449, 407 | B-Type tetramer                       |
| 26  | 14.75                | 280                   | 720 <sup>c</sup>         | 701, <b>635</b> , 577, 575, 451, 425, 407, 289, 287                   | B-Type pentamer                       |
| 27  |                      | 280                   | 865                      | 847, 739, 713, <b>695</b> , 577, 575, 543, 425, 407, 287              | B-Type trimer                         |
| 28  | 15.0                 | 280                   | 864 <sup>c</sup>         | 779, 719, 711, 695, 577, <b>575</b> , 449, 407, 289, 287              | B-Type hexamer                        |
| 29  |                      |                       | 720 <sup>c</sup>         | 709, <b>643</b> , 634, 577, 575, 558, 449, 288                        | B-Type pentamer                       |
| 30  | 15.15                | 280                   | 1153                     | 1135, 1027, 1001, 983, 865, <b>863</b> , 739, 701, 577, 575           | B-Type tetramer                       |
| 31  |                      |                       | 864 <sup>c</sup>         | 779, 719, 695, <b>577</b> , 575, 449, 413, 287                        | B-Type hexamer                        |
| 32  | 15.3                 | 280                   | 739                      | 721, 629, <b>587</b> , 569, 449, 435, 417, 339, 289                   | Cinchonain II <sup>b</sup>            |
| 33  | 15.45                | 280                   | 1008 <sup>c</sup>        | 932, <b>914</b> , 737, 576,                                           | B-Type heptamer                       |
| 34  | 15.55                | 280                   | 1153                     | 1143, 1067, 1008, <b>863</b> , 629, 577, 449                          | B-Type tetramer                       |
| 35  | 15.85                | 265, 356              | 463                      | 300                                                                   | Quercetin-3-O-hexoside                |
| 36  | 15.90                |                       | 609                      | <b>300</b> , 270                                                      | Quercetin-3-O-rhamnoglucoside (rutin) |
| 37  | 16.1                 | 356                   | 463                      | 300                                                                   | Quercetin-3-O-hexoside                |
| 38  | 16.4                 | 356                   | 433                      | 300                                                                   | Quercetin-3-O-pentoside               |
| 39  | 16.6                 | 356                   | 433                      | 300                                                                   | Quercetin-3-O-pentoside               |
| 40  | 16.7                 | 280                   | 1027                     | 875, 857, <b>737</b> , 585, 575, 449, 407                             | Cinchonain III <sup>b</sup>           |

| No. | t <sub>R</sub> (min) | λ <sub>max</sub> (nm) | [M-H] <sup>-</sup> (m/z) | MS <sup>2</sup> fragments (m/z) | Proposed structure                         |
|-----|----------------------|-----------------------|--------------------------|---------------------------------|--------------------------------------------|
| 41  | 16.8                 | 354                   | 433                      | 300                             | Quercetin-3-O-pentoside                    |
| 42  | 17.0                 | 354                   | 433                      | 300                             | Quercetin-3-O-pentoside                    |
| 43  | 17.1                 | 354                   | 447                      | 300                             | Quercetin-3-O-deoxyhexose                  |
| 44  | 17.25                | 284, 300sh            | 567                      | 273                             | Phloretin-2-O'-xyloglucoside               |
| 45  | 17.9                 |                       | 447                      | 314                             | Tamarixetin- or isorhamnetin-3-O-pentoside |
| 46  | 18.0                 | 284, 300sh            | 435                      | 273                             | Phloretin-2-O'-glucoside                   |

NF: Not Fragmented, sh: shoulder. Fragment in bold is major ion. <sup>a</sup>Identified according to Clifford et al. (2003), <sup>b</sup>Hokkanen et al. (2009), <sup>c</sup>doubly-charged ion.

- M. N. Clifford, K. L. Johnston, S. Knight and N. Kuhnert, *Journal of Agricultural and Food Chemistry*, **2003**, 51, 2900-2911.
- J. Hokkanen, S. Mattila, L. Jaakola, A. M. Pirttila and A. Tolonen, *Journal of Agricultural and Food Chemistry*, **2009**, 57, 9437-9447.

**Figure 1.** Metmyoglobin-initiated lipid oxidation at different pepsin concentrations (1, 0.25, and 0.0625 mg/mL with 2828 U/mg) and inhibition by epicatechin in phospholipid-stabilized emulsions at pH 5. Accumulation of conjugated dienes (A) and 4-HNE at 6 hours (B). Degradation of epicatechin (C) and  $\alpha$ -tocopherol without and with epicatechin at different pepsin concentrations (D-E). Epicatechin concentration = 100  $\mu$ M. Values represent mean  $\pm$  SD ( $n = 3$ ).

**A**

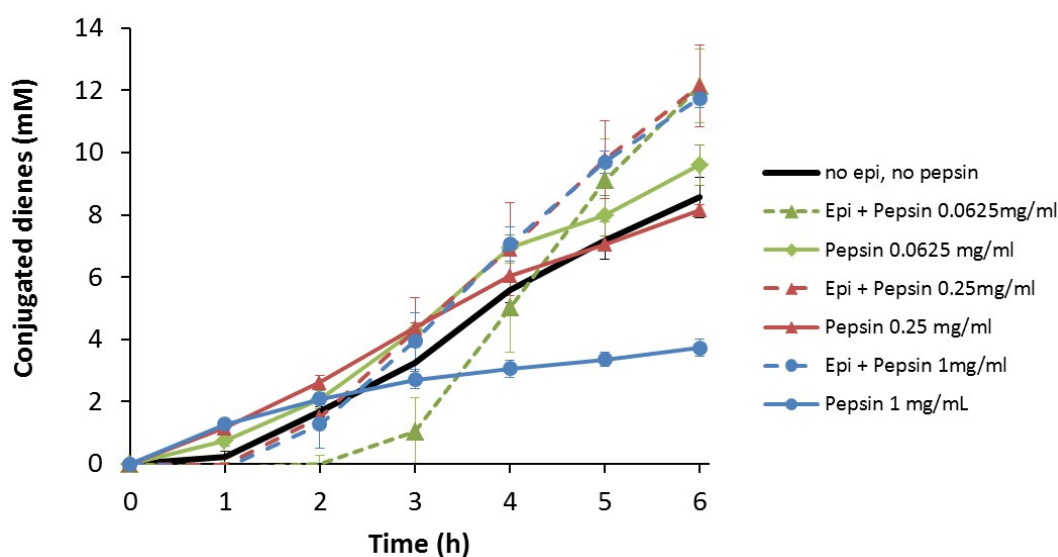

**B**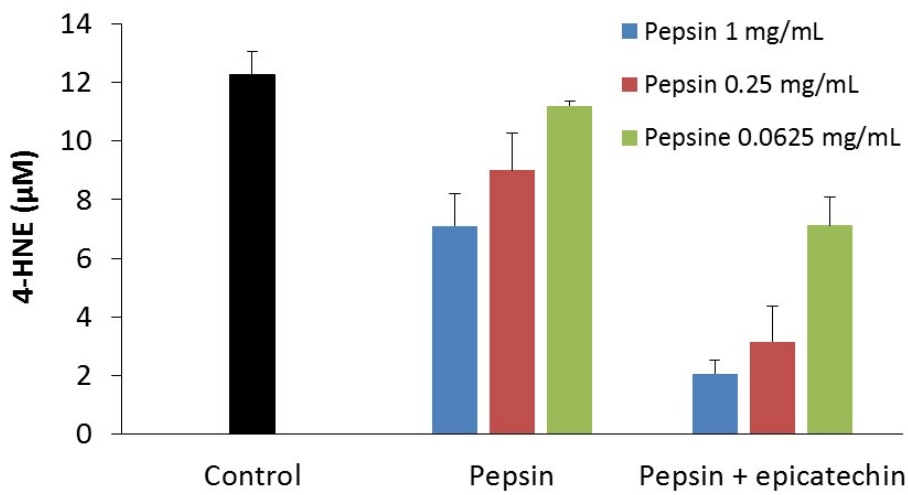**C**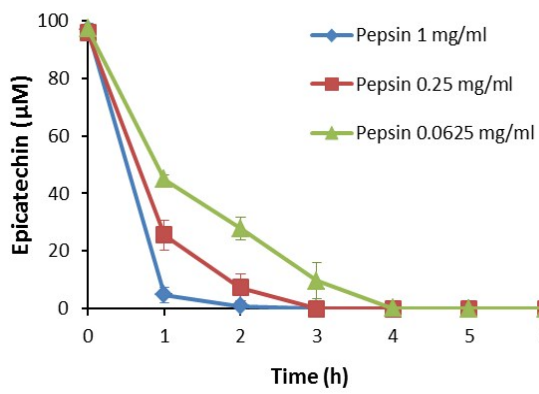**D**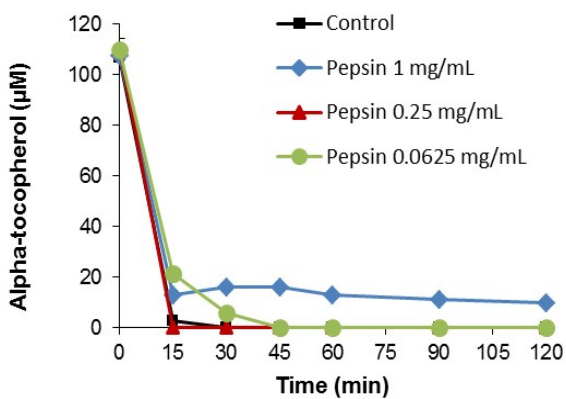**E**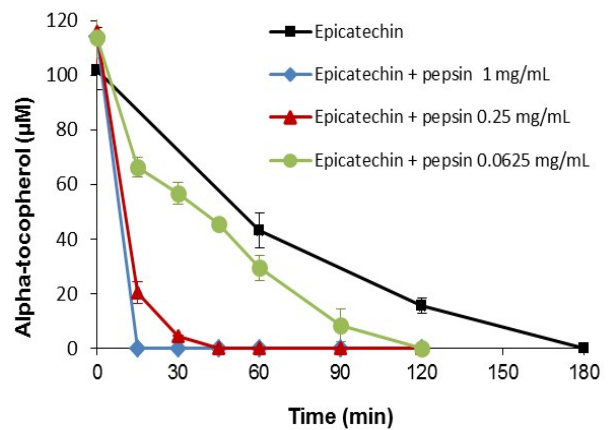

**Figure 2.** Effect of pepsin on the structure of metmyoglobin (5  $\mu\text{M}$ ) in the presence of epicatechin (25  $\mu\text{M}$ ). (A) Addition of pepsin (0.0625 mg/mL with 2041 U/mg) onto metmyoglobin at pH 5. (B) Addition of pepsin (0.0625 mg/mL) onto metmyoglobin at pH 4.

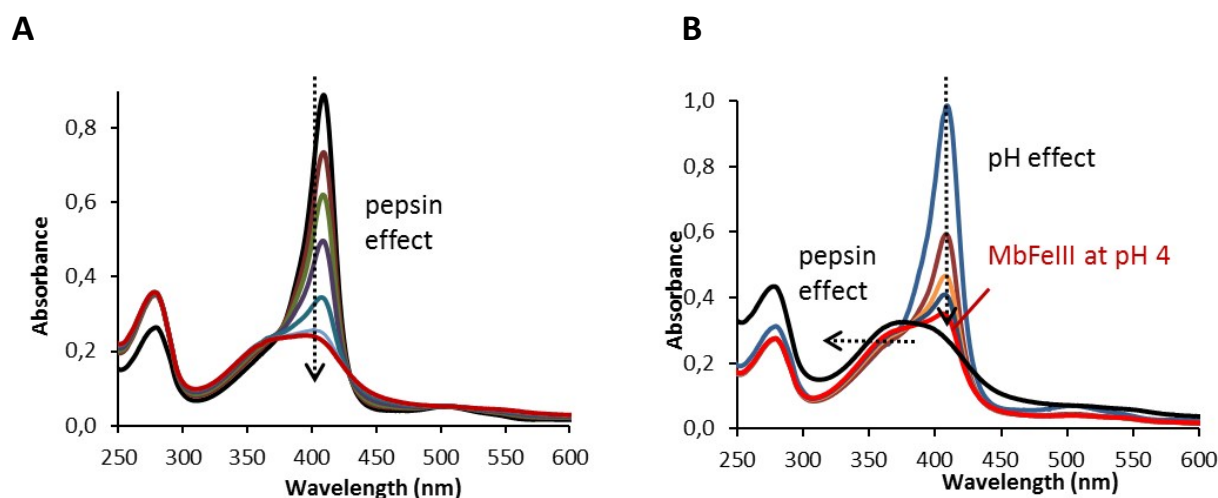

**Table 2 & Figure 3.** Kinetics for the decay of the Soret band of metmyoglobin (5  $\mu\text{M}$ ) at 410 nm upon addition of pepsin (0.0625 mg/mL with 2041 U/mg) at different pH, in the absence or presence of epicatechin (25  $\mu\text{M}$ ). Data are reported as first-order rate constants ( $k$ ) and standard deviations between measured absorbances and calculated values.

Three trials with same epicatechin, pepsin, metmyoglobin solutions per trial.

|                | Without (-)Epicatechin |                       |                        |                       | With (-)Epicatechin    |                       |                        |                       |
|----------------|------------------------|-----------------------|------------------------|-----------------------|------------------------|-----------------------|------------------------|-----------------------|
|                | Trial 1                |                       |                        |                       | Trial 2                |                       |                        |                       |
|                | $k$ (s <sup>-1</sup> ) | SD (s <sup>-1</sup> ) | $k$ (s <sup>-1</sup> ) | SD (s <sup>-1</sup> ) | $k$ (s <sup>-1</sup> ) | SD (s <sup>-1</sup> ) | $k$ (s <sup>-1</sup> ) | SD (s <sup>-1</sup> ) |
| <b>pH 5.01</b> | $9.54 \times 10^{-4}$  | $0.29 \times 10^{-4}$ | $8.79 \times 10^{-4}$  | $0.35 \times 10^{-4}$ | $7.02 \times 10^{-4}$  | $0.17 \times 10^{-4}$ | $7.93 \times 10^{-4}$  | $0.20 \times 10^{-4}$ |
| <b>pH 4.77</b> | $5.13 \times 10^{-3}$  | $0.10 \times 10^{-3}$ | $4.85 \times 10^{-3}$  | $0.10 \times 10^{-3}$ | $3.92 \times 10^{-3}$  | $0.09 \times 10^{-3}$ | $4.14 \times 10^{-3}$  | $0.08 \times 10^{-3}$ |
| <b>pH 4.52</b> | $1.69 \times 10^{-2}$  | $0.10 \times 10^{-2}$ | $2.29 \times 10^{-2}$  | $0.11 \times 10^{-2}$ | $1.66 \times 10^{-2}$  | $0.03 \times 10^{-2}$ | $1.61 \times 10^{-2}$  | $0.03 \times 10^{-2}$ |
| <b>pH 4.26</b> | $3.92 \times 10^{-2}$  | $0.48 \times 10^{-2}$ | $3.75 \times 10^{-2}$  | $0.49 \times 10^{-2}$ | $4.38 \times 10^{-2}$  | $0.20 \times 10^{-2}$ | $4.13 \times 10^{-2}$  | $0.23 \times 10^{-2}$ |

|                | Without (-)Epicatechin |                       |                                                            |                                          | With (-)Epicatechin    |                       |
|----------------|------------------------|-----------------------|------------------------------------------------------------|------------------------------------------|------------------------|-----------------------|
|                | Trial 3                |                       |                                                            |                                          | Trial 3                |                       |
|                | $k$ (s <sup>-1</sup> ) | SD (s <sup>-1</sup> ) | $(k_{\text{epi}} - k_{\text{no epi}}) / k_{\text{no epi}}$ | $k_{\text{pH low}} / k_{\text{pH high}}$ | $k$ (s <sup>-1</sup> ) | SD (s <sup>-1</sup> ) |
| <b>pH 5.01</b> | $6.45 \times 10^{-4}$  | $0.22 \times 10^{-4}$ | 10%                                                        | 7.0                                      | $5.81 \times 10^{-4}$  | $0.14 \times 10^{-4}$ |
| <b>pH 4.77</b> | $4.50 \times 10^{-3}$  | $0.10 \times 10^{-3}$ | 25%                                                        | 2.6                                      | $3.37 \times 10^{-3}$  | $0.06 \times 10^{-3}$ |
| <b>pH 4.52</b> | $1.18 \times 10^{-2}$  | $0.02 \times 10^{-2}$ | 7%                                                         | 3.7                                      | $1.10 \times 10^{-2}$  | $0.02 \times 10^{-2}$ |
| <b>pH 4.26</b> | $4.31 \times 10^{-2}$  | $0.07 \times 10^{-2}$ |                                                            |                                          | $4.92 \times 10^{-2}$  | $0.10 \times 10^{-2}$ |

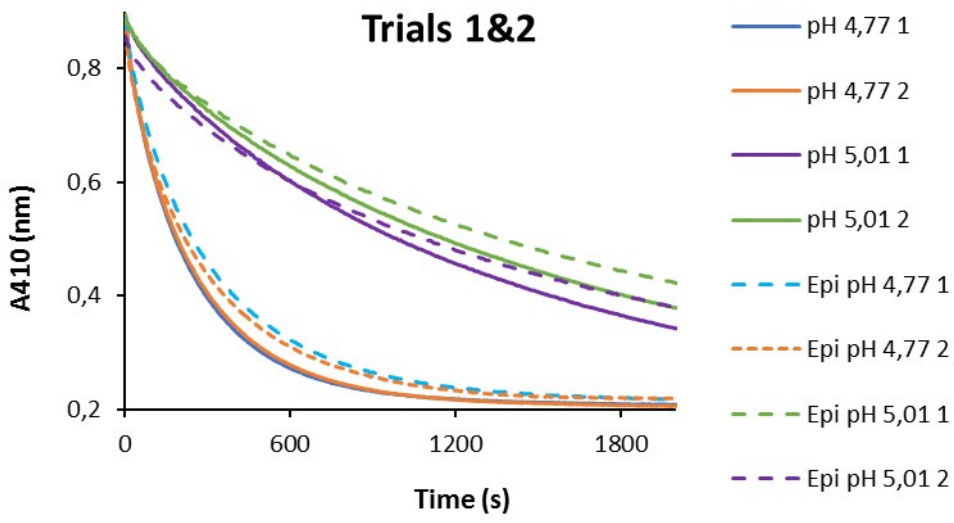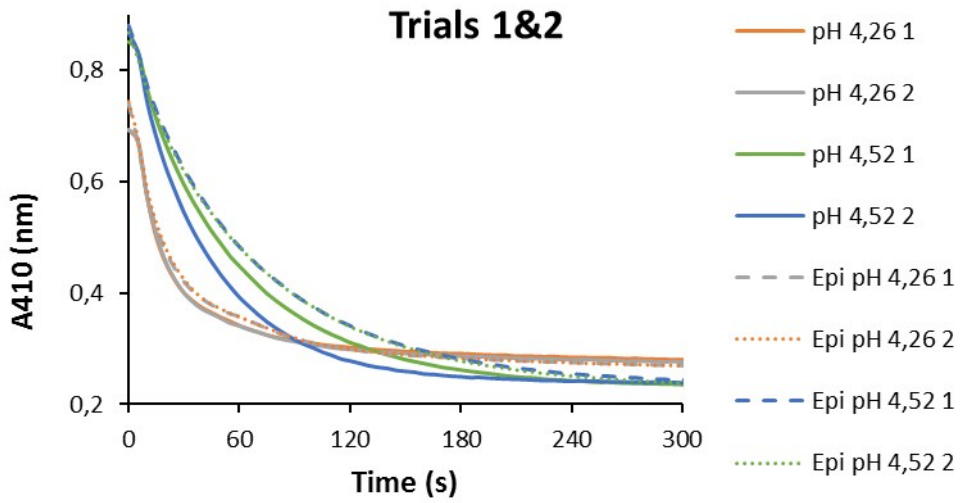

Supplement: c9fo00705a1.pdf [file c9fo00705a1.pdf]
